# Supplementary material for: Evolution of the morphology of Cu2O microcrystals: cube to 50-facet polyhedron through beveled cube and rhombicuboctahedron
Source: Royal Society of Chemistry journal article supplement (doi:10.1039/c7ce00139h), 2017-01-01
Supplement: c7ce00139h1.pdf [file c7ce00139h1.pdf]

Electronic Supplementary Information (ESI) for:

**Evolution of the Morphology of Cu<sub>2</sub>O Microcrystals: Cube to 50-Facets Polyhedron through Beveled Cube and Rhombicuboctahedron**

**Byul-Ee Yeo, Young-Sik Cho, and Young-Duk Huh\***

*Department of Chemistry, Dankook University, 119, Dandae-ro, Dongnam-gu,*

*Cheonan-si, Chungcheongnam-do, 31116, Republic of Korea*

*\*E-mail: ydhuh@dankook.ac.kr; Fax: +82-41-559-7860; Tel: +82-41-550-3458*

### Supplementary Figure 1

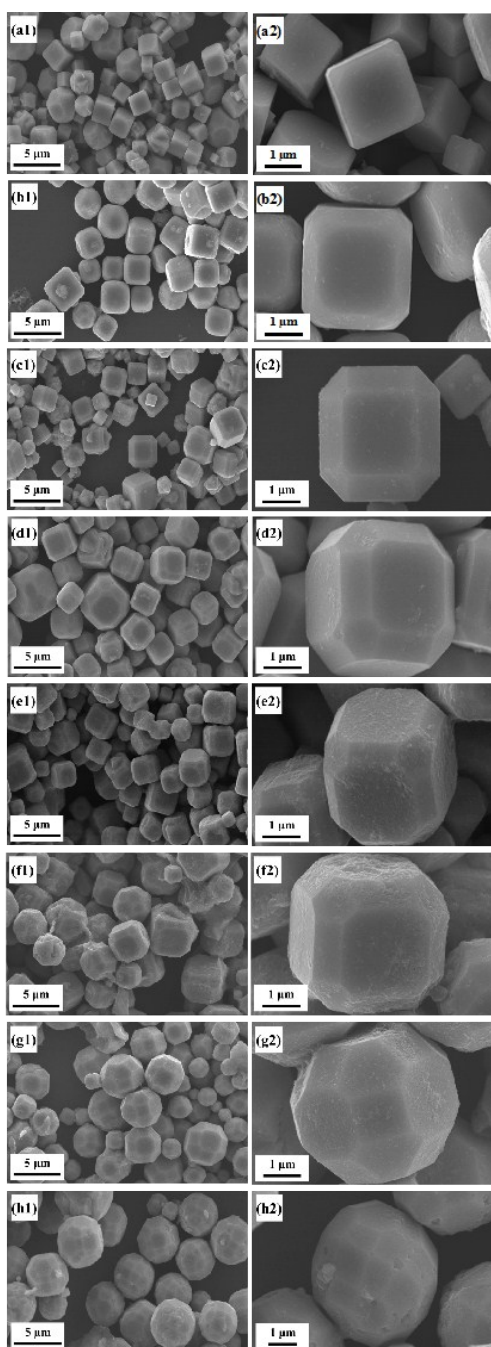

Figure S1. (1) Low magnification SEM images and (2) high magnification SEM images of the  $\text{Cu}_2\text{O}$  microcrystals prepared with various NaOH concentrations: (a) 2.5 M, (b) 5.0 M, (c) 6.0 M, (d) 7.0 M, (e) 8.0 M, (f) 9.0 M, (g) 10.0 M, and (h) 15.0 M.
